# Supplementary material
Source: publisher figshare collection journal article supplement (https://gsajournals.figshare.com/ndownloader/files/32401718)
Supplement: Supplementary file 1 [file 32401718]

## Sheet: Table S1
Table S1-1 Statistics of genome sequencing data for surveying of GL1 chimeric plant.
Sequencing type	Platform	Insert size	Total data(G)	Reads Length	Sequence Coverage (✕) *
Illumina	Illumina HiSeq	350bp	58.18	150bp	~120
*Sequence coverage was calculated based on the genome size of 497.15 Mb according to k-mer analysis.
Table S1-2 Statistics of genome sequencing data for assemblely of GL1 chimeric plant.
Sequencing type	Platform	Insert size	Total data(G)	Reads Length	Sequence Coverage (✕) *
Pacbio reads	Pacbio Sequel	30kb	138.72	-	~286
Illumina	Illumina HiSeq	350bp	76.02	150bp	~157
Hi-C	Illumina HiSeq	350bp	102.76	150bp	~212
*Sequence coverage was calculated based on the genome size of 497.15 Mb according to k-mer analysis.
Table S1-3 Statistics of genome sequencing data of green plant generated from the stem of GL1 by tissue culture which lost the chimeric character of the leaves.
Sequencing type	Platform	Insert size	Total data(G)	Reads Length	Sequence Coverage (✕) *
Illumina	Illumina HiSeq	350bp	76.2	150bp	~157
*Sequence coverage was calculated based on the genome size of 497.15 Mb according to k-mer analysis.

## Sheet: Table S2
Table S2 Survey results for GL1 based on k-mer analysis.
Kmer size	Kmer number	Genome size (Mb)	Heterozygous rate (%)	Repeat rate (%)
17	48358315031	497.15	2.08	59.02

## Sheet: Table S3
Table S3 Summary of assembled 25 pseudo-chromosomes of GL1.
Chromosome	Length(bp)
Chr1	19385557
Chr2	17766452
Chr3	15117151
Chr4	26436549
Chr5	16846288
Chr6	12745194
Chr7	24154052
Chr8	19139102
Chr9	24066815
Chr10	15340519
Chr11	17875868
Chr12	12472546
Chr13	23184383
Chr14	17668965
Chr15	14042169
Chr16	16064232
Chr17	22327267
Chr18	20453541
Chr19	31887959
Chr20	23521927
Chr21	21048047
Chr22	22858493
Chr23	13584566
Chr24	14798847
Chr25	20383276
Linked total	483169765
Unlinked total	34304
Linked Percent	>99%

## Sheet: Table S4
Table S4 Summary of the genome assembly of GL1.
	Length		Number
	Contig (bp)	Scaffold(bp)	Contig	Scaffold
Total	483151661	483204069	516	37
Max	8396010	31887959	-	-
N50	3109115	3267189	51	11
N60	2767570	19139102	67	13
N70	2403314	17668965	86	16
N80	1726694	15340519	109	19
N90	882000	14042169	147	22

## Sheet: Table S5
Table S5 Summary of BUSCO analysis results of GL1.
Type	Number	Compare to the total BUSCO groups (%)
Complete BUSCOs a	1571	97.3
Complete and single-copy BUSCOs	1542	95.5
Complete and duplicated BUSCOs b	29	1.8
Fragmented BUSCOs c	8	0.5
Missing BUSCOs	35	2.2
Total BUSCOs groups searched d	1614	100
a 'Complete BUSCOs': The length of aligned sequences of orthologs from GL1 is over 95% of BUSCO group's mean length.
b 'Complete and duplicated BUSCOs':Multiple copies of complete BUSCOs.
c 'Fragmented BUSCOs': The BUSCOs meet the 'expected-score' cut-off, but not complete.
d The lineage dataset is embryophyta_odb10 (number of BUSCOs: 1614).

## Sheet: Table S6
Table S6 Statistics of mapping ratio of Illumina data to GL1 assembly .
Type	Content	Value
Reads	Mapping rate (%)	0.9369
Genome	Average sequencing depth (✕）	150.35
	Coverage (%)	0.997
	Coverage at least 4✕ (%)	0.9942
	Coverage at least 10✕ (%)	0.9909
	Coverage at least 20✕ (%)	0.986

## Sheet: Table S7
Table S7 Detailed classification of repeat sequences in GL1 assembly.
Type	Subclass1	subclass2	sublcass3	Length (bp)	Proportion in Genome（%）
Transposon elements	DNA transposon	-	-	63666688	13.18
	Retroelement	LTR Retrotransposon	Copia	39750896	8.23
			Gypsy	102874460	21.29
			Other LTR	73842301	15.28
		SINEs	-	15163	0.41
		LINEs	-	12405887	2.57
Tandem	-	-	-	1999435	0.41
Unknown	-	-	-	32998455	6.83
Total				329537945	68.2

## Sheet: Table S8
Table S8 The full-length LTR identification and insertion time analysis in three chromosome-level pineapple genomes (GL1, CB5 and F153).
	GL1	CB5	F153
Number of full-length LTR	5021	3634	609
Number of LTR with insertion time <=1mya	4437	2964	223
Number of LTR with insertion time >1mya and <=2mya	487	544	286
Number of LTR with insertion time >2mya	97	126	100

## Sheet: Table S9
Table S9 Statistics of annotation for protein coding genes and Non-coding RNAs of GL1.
Type	Number	Percent (%)
Total protein coding genes	26113	-
Total mRNA	27085	-
Average gene length	3747.08bp	-
Total exons	141394	-
Average number of exons per gene	5.22	-
Gene density per 100 kilobases (kb)	5.42	-
Number of Swissprot annoted genes	15797	60.49
Number of NR annoted genes	21771	83.37
Number of PFAM annoted genes	17152	65.68
Number of KEGG annoted genes	4509	17.27
Number of GO annoted genes	13454	51.52
Total SnRNA	194	-
Total MiRNA	142	-
Total tRNA	379	-
Total rRNA	94	-

## Sheet: Table S10
Table S10 Detail species information used for phylogenetic analysis
Species	Database	geome Version or Bioproject number
Ananas comosus var. bracteatus.f.tricolors GL1	CNGBdb	CNP0001166 (This analysis)
Ananas comosus var. bracteatus CB5*1	EBI-ENA	PRJEB33121
Ananas comosus (L.) Merr. F153	Pineapple Genomics Database	V3
Ananas comosus (L.) Merr. MD2	EBI-ENA	LSRQ01000000
Musa balbisiana	NCBI	BananaB_V1
Setaria viridis	NCBI	Setaria_viridis_v2.0
Phoenix dactylifera	NCBI	palm_55x_up_171113_PBpolish2nd_filt_p
Dendrobium catenatum	NCBI	ASM160598v2
Halaenopsis equestris	NCBI	ASM126359v1
Oryza sativa	Ensemble	IRGSP-1.0
Asparagus officinalis	NCBI	Aspof.V1
Elaeis guineensis	NCBI	EG5
Nymphaea colorata	BIG Data Center	GWHAAYW00000000
Arabidopsis thaliana*2	Ensemble	TAIR10
*1CB5 genome and annotation file were download from https://www.life.illinois.edu/ming/LabWebPage/Downloads.html provided by its author.
*2Arabidopsis thaliana only used as a ref for gene family identification in pineapple genomes

[truncated: 13 more sheets: Table S11, Table S12, Table S13, Table S14, Table S15, Table S16, Table S17, Table S18, Table S19, Table S20, Table S21, Table S22, Table S23]
